## Correction

**Correction: Recruited mast cells in the tumor microenvironment enhance bladder cancer metastasis via modulation of ER $\beta$ /CCL2/CCR2 EMT/MMP9 signals****Qun Rao<sup>1,2,3,\*</sup>, Yuan Chen<sup>2,3,\*</sup>, Chiuan-Ren Yeh<sup>3,\*</sup>, Jie Ding<sup>3</sup>, Lei Li<sup>3</sup>, Chawnshang Chang<sup>3</sup> and Shuyuan Yeh<sup>3</sup>**

<sup>1</sup>Department of Gynaecology and Obstetrics, Tongji Medical College/Hospital, Huazhong University of Science and Technology, Wuhan, China

<sup>2</sup>Sex Hormone Research Center, Department of Urology, Tongji Medical College/Hospital, Huazhong University of Science and Technology, Wuhan, China

<sup>3</sup>George Whipple Lab for Cancer Research, Departments of Urology and Pathology, University of Rochester Medical Center, Rochester, NY, USA

\*These authors have contributed equally to this work

**Published:**

**Copyright:** © 2020 Rao et al. This is an open access article distributed under the terms of the [Creative Commons Attribution License](#) (CC BY 3.0), which permits unrestricted use, distribution, and reproduction in any medium, provided the original author and source are credited.

**This article has been corrected:** Due to errors during data transfer among different devices during preparation of the manuscript, accidental image duplication and overlap occurred in Figures 4G, 1D, and between Figures 3D and 6D. The corrected figures are shown below. The authors declare that these corrections do not change the results or conclusions of this paper.

Original article: Oncotarget. 2016; 7:7842–7855. <https://doi.org/10.18632/oncotarget.5467>

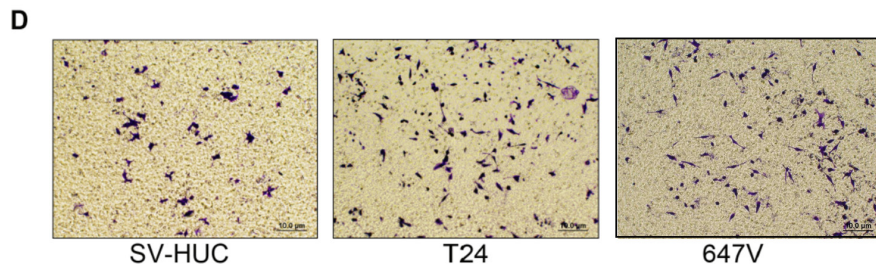

**Figure 1: Bladder cancer tissues recruit more mast cells than non-malignant bladder tissues. (D)** BCa cells promote mast cell migration. Mast cells ( $1 \times 10^5$ ) were added in the upper chambers. We seeded non-malignant bladder SV-HUC cells and 2 different BCa cell lines, T24 and 647V ( $1 \times 10^6$ ) in the bottom wells. After 4 hrs of incubation, the bottom sides of insert wells were fixed and stained to visualize the migrated mast cells.

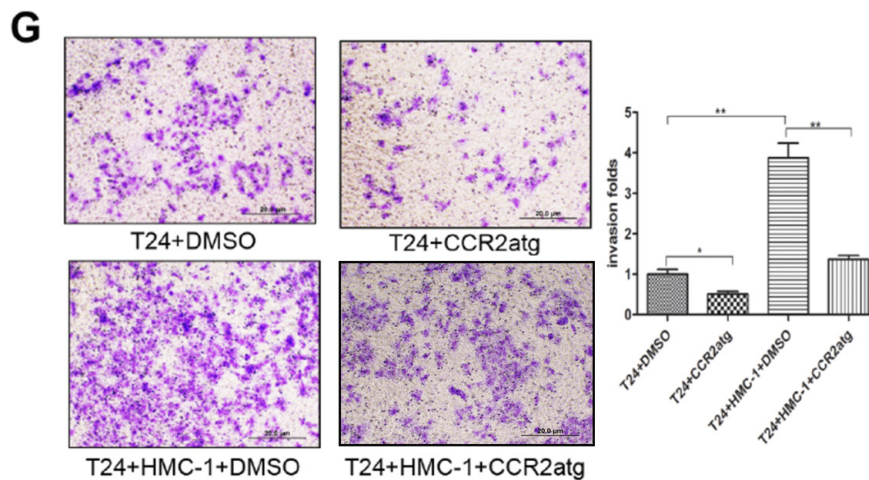

**Figure 4: Recruited mast cells could increase ER $\beta$  and consequently up-regulate CCL2 signaling. (G)** Blocking CCL2 with CCR2 antagonist could at least partially reverse the mast cell-promoted BCa cell invasion in both T24 and 647v cells. \* $p < 0.05$ ; \*\* $p < 0.01$ ; \*\*\* $p < 0.001$ .

D

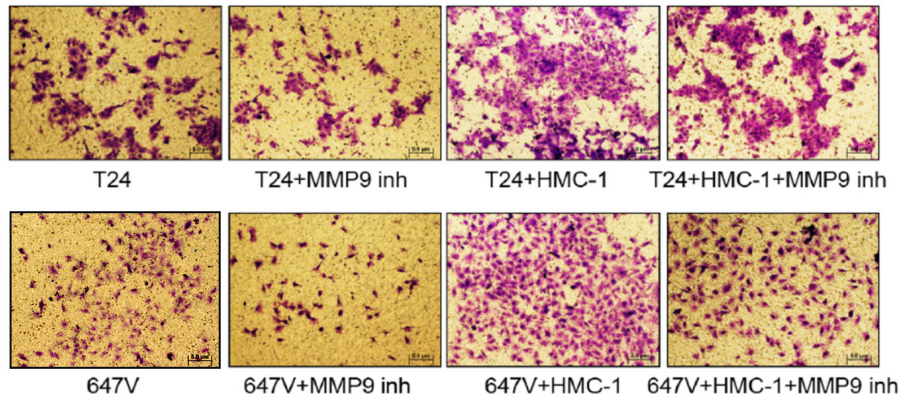

**Figure 6: EMT could function via increasing MMP9 to enhance BCa cell invasion. (D)** Blocking MMP9 with MMP9 inhibitor (inh) can partly reverse mast cell-promoted T24 and 647V cells invasion. \* $p < 0.05$ ; \*\* $p < 0.01$ ; \*\*\* $p < 0.001$
